# Supplementary material
Source: publisher figshare collection journal article supplement (https://springernature.figshare.com/ndownloader/files/18095279)
Supplement: Supplementary file 1 [file 18095279]

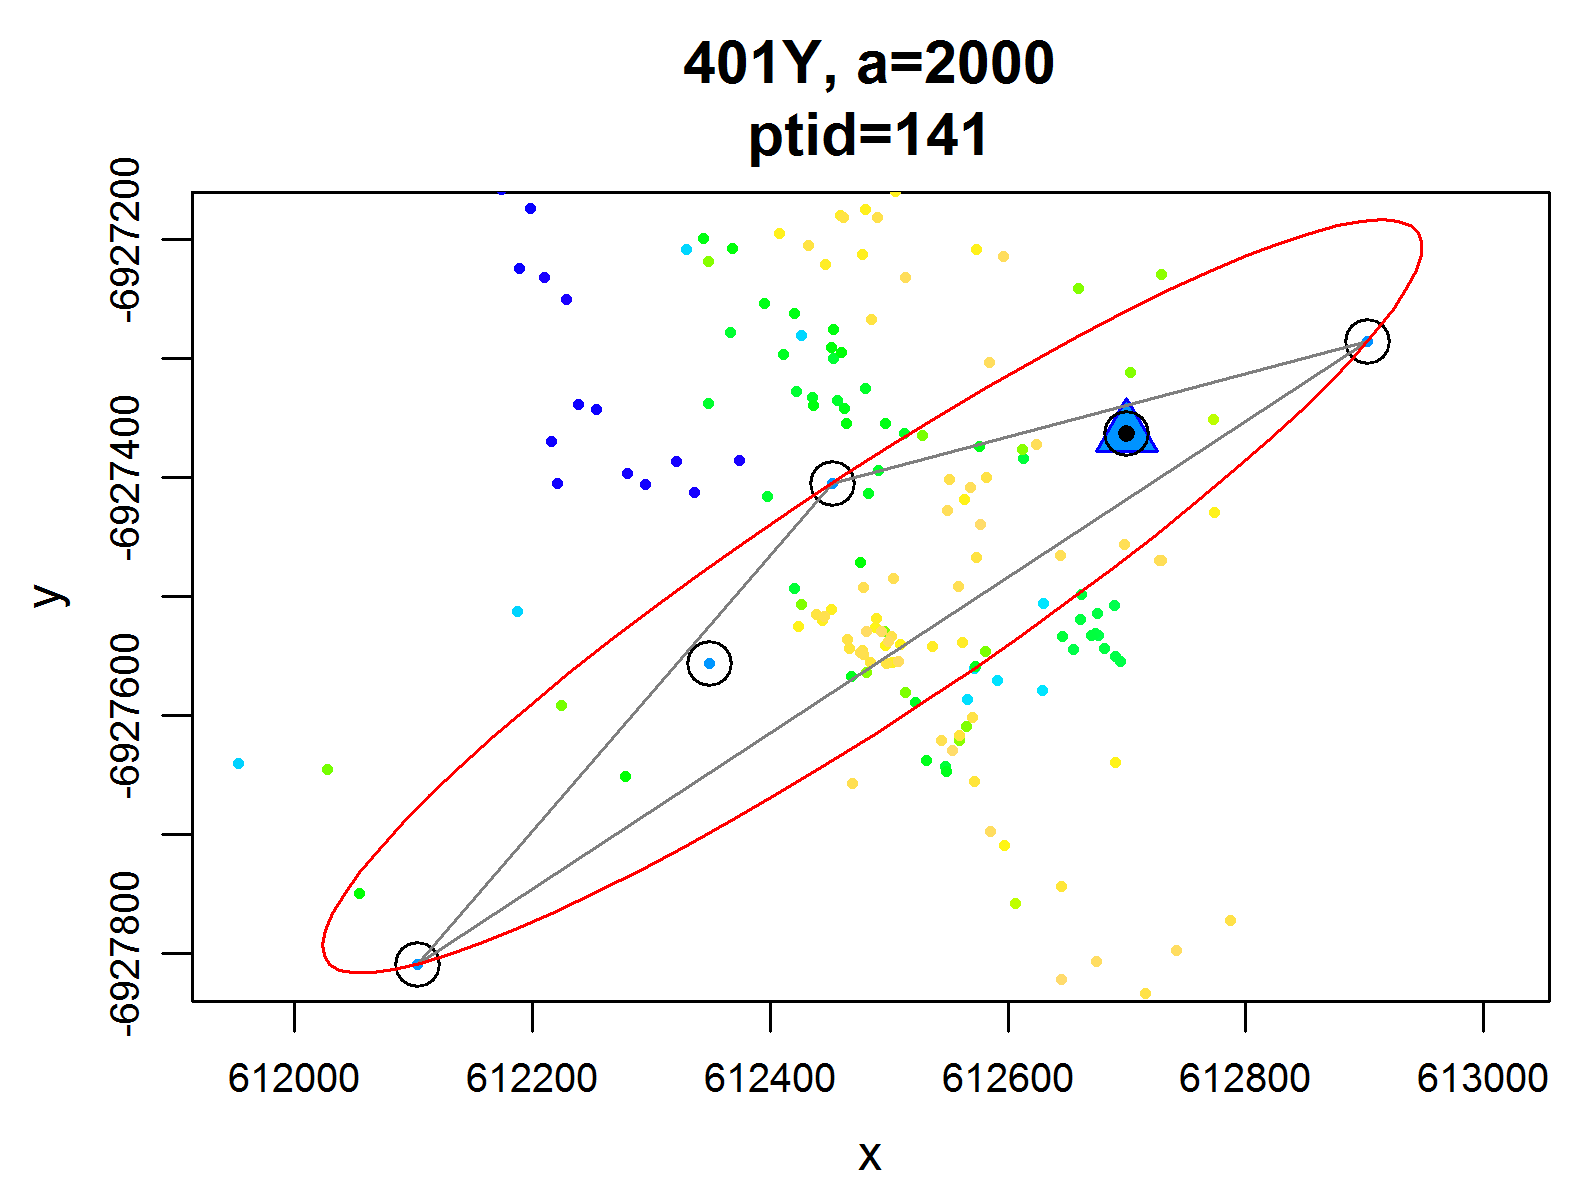


**Additional file 3 Sample Time Local Convex Hull (401Y)**. A randomly selected example hull from the GPS data set of leopard seal 401Y. The parent point (ptid = 141) is shown by a triangle and highlighted in blue. Nearest neighbors are circled. Non-selected points within the hull were close in space, but excluded due to temporal distance. The red ellipse has a characteristic eccentricity or elongation that is used to estimate relative direction of travel.
